# Supplementary material for: A Sustainable Approach to Fabricating Ag Nanoparticles/PVA Hybrid Nanofiber and Its Catalytic Activity
Source: PubMed Central journal article supplement (PMC5312901; doi:10.3390/nano5021124), 2015-06-23
Supplement: nanomaterials-05-01124-s001.pdf [file nanomaterials-05-01124-s001.pdf]

## Supplementary Information

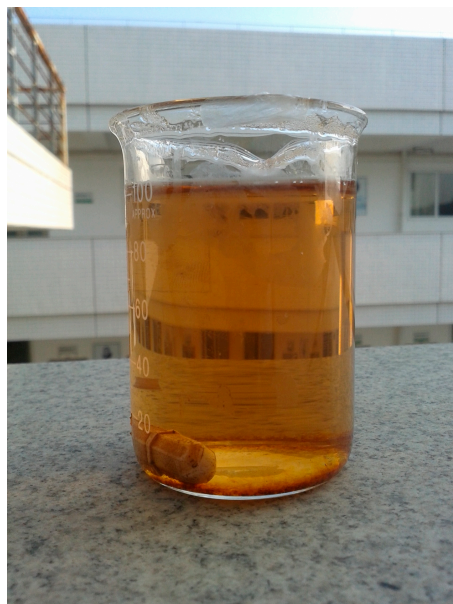

**Figure S1.** Image of  $\text{AgNO}_3/\text{PVA}$  hybrid solution before electrospinning.

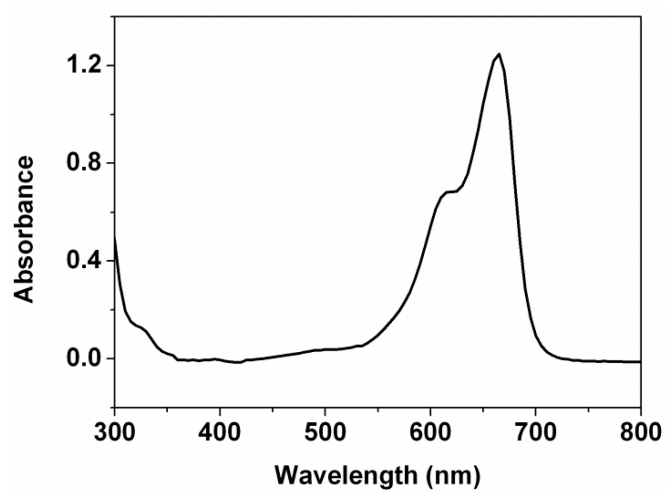

**Figure S2.** UV-Vis spectrum of MB.

© 2015 by the author; licensee MDPI, Basel, Switzerland. This article is an open access article distributed under the terms and conditions of the Creative Commons Attribution license (<http://creativecommons.org/licenses/by/4.0/>).
